# Supplementary material for: Phytochemical Screening and Potential Antibacterial Activity of Defatted and Nondefatted Methanolic Extracts of Xao Tam Phan (Paramignya trimera (Oliv.) Guillaum) Peels against Multidrug-Resistant Bacteria
Source: Hindawi journal article supplement (doi:10.1155/2021/4233615), 2021-08-31
Supplement: f1 [file 4233615.f1.pdf]

## Title and Authorship Information

Manuscript title:

**Phytochemical screening and potential antibacterial activity of defatted and non-defatted methanolic extracts of Xiao tam phan (*Paramignya trimera* (Oliv.) Guillaum) peels against multidrug-resistant bacteria.**

*Full author names, institutional mailing addresses and email addresses*

Van-Anh Le Thi

Department of Life Sciences, University of Science and Technology of Hanoi, Vietnam  
Academy of Science and Technology, 18-Hoang Quoc Viet, Cau Giay, Hanoi, Vietnam  
[le-thi-van.anh@usth.edu.vn](mailto:le-thi-van.anh@usth.edu.vn)

Ngoc-Lien Nguyen

Department of Life Sciences, University of Science and Technology of Hanoi, Vietnam  
Academy of Science and Technology, 18-Hoang Quoc Viet, Cau Giay, Hanoi, Vietnam  
[rubynguyenlien@gmail.com](mailto:rubynguyenlien@gmail.com)

Quang-Huy Nguyen

Department of Life Sciences, University of Science and Technology of Hanoi, Vietnam  
Academy of Science and Technology, 18-Hoang Quoc Viet, Cau Giay, Hanoi, Vietnam  
[nguyen-quang.huy@usth.edu.vn](mailto:nguyen-quang.huy@usth.edu.vn)

Van-Quyen Dong

Department of Life Sciences, University of Science and Technology of Hanoi (USTH),  
Vietnam Academy of Science and Technology (VAST). 18 Hoang Quoc Viet, Cau Giay,  
Hanoi, Vietnam  
Institute of Biotechnology, Vietnam Academy of Science and Technology (VAST). 18  
Hoang Quoc Viet, Cau Giay, Hanoi, Vietnam  
[dvquyen@gmail.com](mailto:dvquyen@gmail.com)

Thi-Yen Do

Department of Life Sciences, University of Science and Technology of Hanoi, Vietnam  
Academy of Science and Technology, 18-Hoang Quoc Viet, Cau Giay, Hanoi, Vietnam  
[yen877398@gmail.com](mailto:yen877398@gmail.com)

Kieu-Oanh Nguyen T.

Department of Life Sciences, University of Science and Technology of Hanoi, Vietnam  
Academy of Science and Technology, 18-Hoang Quoc Viet, Cau Giay, Hanoi, Vietnam  
[nguyen-thi-kieu.oanh@usth.edu.vn](mailto:nguyen-thi-kieu.oanh@usth.edu.vn)

Correspondence should be addressed to:

Kieu-Oanh Nguyen Thi, Department of Life Sciences, University of Science and  
Technology of Hanoi (USTH), Vietnam Academy of Science and Technology (VAST). 18  
Hoang Quoc Viet, Cau Giay, Hanoi  
E-mail: [nguyen-thi-kieu.oanh@usth.edu.vn](mailto:nguyen-thi-kieu.oanh@usth.edu.vn)  
Mobile phone: +84-9 88 40 76 36  
Phone & Fax: +84-24 37 91 69 60

## Supplementary materials

Table 1S: Chemical composition of different tissues of *P. trimera* in previous studies

| No | Compound                                                    | Monoisotopic mass | Formula                                         | Tissue | References |
|----|-------------------------------------------------------------|-------------------|-------------------------------------------------|--------|------------|
| 1  | rutin                                                       | 610.15338         | C <sub>27</sub> H <sub>30</sub> O <sub>16</sub> | root   | [16]       |
| 2  | quercetin                                                   | 302.04265         | C <sub>15</sub> H <sub>10</sub> O <sub>7</sub>  | root   | [16]       |
| 3  | kaempferol                                                  | 286.04773         | C <sub>15</sub> H <sub>10</sub> O <sub>6</sub>  | root   | [16]       |
| 4  | (±)-naringenin                                              | 272.06847         | C <sub>15</sub> H <sub>12</sub> O <sub>5</sub>  | root   | [16]       |
| 5  | myricetin                                                   | 318.03756         | C <sub>15</sub> H <sub>10</sub> O <sub>8</sub>  | root   | [16]       |
| 6  | luteolin                                                    | 286.04773         | C <sub>15</sub> H <sub>10</sub> O <sub>6</sub>  | root   | [16]       |
| 7  | apigenin                                                    | 270.05282         | C <sub>15</sub> H <sub>10</sub> O <sub>5</sub>  | root   | [16]       |
| 8  | (-)-epigallocatechin gallate                                | 458.08491         | C <sub>22</sub> H <sub>18</sub> O <sub>11</sub> | root   | [16]       |
| 9  | (+)-catechin                                                | 290.07904         | C <sub>15</sub> H <sub>14</sub> O <sub>6</sub>  | root   | [16]       |
| 10 | (-)-epicatechin                                             | 290.07904         | C <sub>15</sub> H <sub>14</sub> O <sub>6</sub>  | root   | [16]       |
| 11 | gallic acid                                                 | 170.02152         | C <sub>7</sub> H <sub>6</sub> O <sub>5</sub>    | root   | [16]       |
| 12 | p-coumaric acid                                             | 164.04734         | C <sub>9</sub> H <sub>8</sub> O <sub>3</sub>    | root   | [16]       |
| 13 | chlorogenic acid                                            | 354.09508         | C <sub>16</sub> H <sub>18</sub> O <sub>9</sub>  | root   | [16]       |
| 14 | caffeic acid                                                | 180.04225         | C <sub>9</sub> H <sub>8</sub> O <sub>4</sub>    | root   | [16]       |
| 15 | syringic acid                                               | 198.05282         | C <sub>9</sub> H <sub>10</sub> O <sub>5</sub>   | root   | [16]       |
| 16 | 5,7-dimethoxycoumarin                                       | 206.05790         | C <sub>11</sub> H <sub>10</sub> O <sub>4</sub>  | root   | [16]       |
| 17 | methyl 4-hydrobenzoate                                      | 304.09468         | C <sub>16</sub> H <sub>16</sub> O <sub>6</sub>  | stem   | [8]        |
| 18 | methyl p (E)-coumarate                                      | 220.07355         | C <sub>12</sub> H <sub>12</sub> O <sub>4</sub>  | stem   | [8]        |
| 19 | methyl syringate                                            | 212.06847         | C <sub>10</sub> H <sub>12</sub> O <sub>5</sub>  | stem   | [8]        |
| 20 | vanillin                                                    | 152.04734         | C <sub>8</sub> H <sub>8</sub> O <sub>3</sub>    | stem   | [8]        |
| 21 | (E)-methyl 3-(4'-hydroxy-3',5'-dimethoxyphenyl) acrylate    | 238.08412         | C <sub>12</sub> H <sub>14</sub> O <sub>5</sub>  | stem   | [8]        |
| 22 | methyl ferulate                                             | 208.07355         | C <sub>11</sub> H <sub>12</sub> O <sub>4</sub>  | stem   | [8]        |
| 23 | methyl 4-hydroxy-3-methoxybenzoate                          | 182.05790         | C <sub>9</sub> H <sub>10</sub> O <sub>4</sub>   | stem   | [8]        |
| 24 | vanillic acid                                               | 168.04225         | C <sub>8</sub> H <sub>8</sub> O <sub>4</sub>    | stem   | [8]        |
| 25 | escin                                                       | 1130.55090        | C <sub>55</sub> H <sub>86</sub> O <sub>24</sub> | root   | [18]       |
| 26 | beta-sitosterol                                             | 414.38616         | C <sub>29</sub> H <sub>50</sub> O               | root   | [18]       |
| 27 | b-sitosterol-beta-D-glucoside                               | 576.43899         | C <sub>35</sub> H <sub>60</sub> O <sub>6</sub>  | root   | [18]       |
| 28 | 7-hydroxycoumarin                                           | 162.03169         | C <sub>9</sub> H <sub>6</sub> O <sub>3</sub>    | root   | [9, 19]    |
| 29 | 7-methoxycoumarin                                           | 176.04734         | C <sub>10</sub> H <sub>8</sub> O <sub>3</sub>   | root   | [9, 19]    |
| 30 | ostruthin                                                   | 298.15689         | C <sub>19</sub> H <sub>22</sub> O <sub>3</sub>  | root   | [9, 19]    |
| 31 | ninhvanin (8-methoxyostruthin)                              | 329.17528         | C <sub>20</sub> H <sub>25</sub> O <sub>4</sub>  | root   | [9, 19]    |
| 32 | 6-(6-Hydroxy-3,7-dimethylocta-2,7-dienyl)-7-hydroxycoumarin | 314.15180         | C <sub>19</sub> H <sub>22</sub> O <sub>4</sub>  | root   | [19]       |
| 33 | Paratrimerin A                                              | 780.26294         | C <sub>40</sub> H <sub>44</sub> O <sub>16</sub> | root   | [9, 19]    |
| 34 | Paratrimerin B                                              | 912.30520         | C <sub>45</sub> H <sub>52</sub> O <sub>20</sub> | root   | [9, 19]    |
| 35 | Paratrimerin C                                              | 282.07660         | C <sub>16</sub> H <sub>12</sub> NO <sub>4</sub> | root   | [12]       |
| 36 | Paratrimerin D                                              | 410.19670         | C <sub>24</sub> H <sub>28</sub> NO <sub>5</sub> | root   | [12]       |
| 37 | Paratrimerin E                                              | 332.16237         | C <sub>19</sub> H <sub>24</sub> O <sub>5</sub>  | root   | [12]       |
| 38 | Paratrimerin F                                              | 296.14124         | C <sub>19</sub> H <sub>20</sub> O <sub>3</sub>  | root   | [12]       |

|    |                                                                  |           |                                                 |      |          |
|----|------------------------------------------------------------------|-----------|-------------------------------------------------|------|----------|
| 39 | Paratrimerin G                                                   | 238.12051 | C <sub>13</sub> H <sub>18</sub> O <sub>4</sub>  | root | [10]     |
| 40 | Paratrimerin H                                                   | 240.09977 | C <sub>12</sub> H <sub>16</sub> O <sub>5</sub>  | root | [10]     |
| 41 | Scopoletin                                                       | 192.04225 | C <sub>10</sub> H <sub>8</sub> O <sub>4</sub>   | root | [12]     |
| 42 | Xanthyletin                                                      | 228.07864 | C <sub>14</sub> H <sub>12</sub> O <sub>3</sub>  | root | [12]     |
| 43 | Pandanusin A                                                     | 315.15963 | C <sub>19</sub> H <sub>23</sub> O <sub>4</sub>  | root | [12]     |
| 44 | 8-Geranyl-7-hydroxycoumarin                                      | 298.15689 | C <sub>19</sub> H <sub>22</sub> O <sub>3</sub>  | stem | [17]     |
| 45 | 6-(7-Hydroperoxy-3,7-dimethylocta-2,5-dienyl)-7-hydroxycoumarin  | 331.15710 | C <sub>19</sub> H <sub>23</sub> O <sub>5</sub>  | stem | [17]     |
| 46 | 6-(6',7'-Dihydroxy-3',7'-dimethylocta-2'-enyl)-7-hydroxycoumarin | 332.16237 | C <sub>19</sub> H <sub>24</sub> O <sub>5</sub>  | stem | [17]     |
| 47 | luvangetin                                                       | 258.08921 | C <sub>15</sub> H <sub>14</sub> O <sub>4</sub>  | stem | [17]     |
| 48 | Citrusinine-I                                                    | 301.09502 | C <sub>16</sub> H <sub>15</sub> NO <sub>5</sub> | root | [12, 17] |
| 49 | Glycocitrine-III                                                 | 325.13140 | C <sub>19</sub> H <sub>19</sub> NO <sub>4</sub> | root | [12, 17] |
| 50 | Oriciacidone E                                                   | 325.13141 | C <sub>19</sub> H <sub>19</sub> NO <sub>4</sub> | root | [17]     |
| 51 | Oriciacidone                                                     | 324.12110 | C <sub>19</sub> H <sub>18</sub> NO <sub>4</sub> | root | [12, 17] |
| 52 | 5-Hydroxynoracronycin                                            | 323.11575 | C <sub>19</sub> H <sub>17</sub> NO <sub>4</sub> | root | [12, 17] |
| 53 | Daedalin A                                                       | 192.07864 | C <sub>11</sub> H <sub>12</sub> O <sub>3</sub>  | root | [17]     |
| 54 | 6-(2-hydroxyetyl)-2,2-dimetyl-2H-1-benzopyran                    | 204.11503 | C <sub>13</sub> H <sub>16</sub> O <sub>2</sub>  | root | [9]      |

Table 2S: Susceptibility test of eight bacterial strains against different antibiotics. (+) the strain was resistant to the antibiotic, (-) the strain was sensitive to the antibiotic, (I) the antibiotic can inhibit the strain, nd: not determined.

| Antibiotics used                               | <i>P. aeruginosa</i> |     | <i>S. aureus</i> |     | <i>Salmonella sp</i> |     | <i>A. baumannii</i> | <i>E.coli</i> |
|------------------------------------------------|----------------------|-----|------------------|-----|----------------------|-----|---------------------|---------------|
|                                                | PA1                  | PA2 | SA1              | SA2 | SS2                  | SS1 | AB                  | EC            |
| Amikacin 30µg                                  | +                    | +   | nd               | nd  | nd                   | nd  | +                   | -             |
| Ampicillin 10µg                                | +                    | +   | +                | +   | nd                   | nd  | +                   | I             |
| Fosfomycin 200µg                               | +                    | +   | -                | +   | nd                   | nd  | +                   | nd            |
| Gentamicin 10µg                                | +                    | +   | -                | +   | nd                   | nd  | +                   | -             |
| Netilmicin 10µg                                | +                    | +   | nd               | nd  | nd                   | nd  | +                   | nd            |
| Tobramycin 10µg                                | +                    | +   | -                | +   | nd                   | nd  | +                   | -             |
| Chloramphenicol 30µg                           | +                    | +   | nd               | nd  | nd                   | nd  | nd                  | nd            |
| Meropenem 10µg                                 | +                    | +   | nd               | nd  | nd                   | nd  | nd                  | -             |
| Ertapenem 10µg                                 | +                    | +   | nd               | nd  | nd                   | nd  | +                   | -             |
| Imipenem 10µg                                  | +                    | +   | nd               | nd  | nd                   | nd  | +                   | -             |
| Cephalexin 30µg                                | +                    | +   | nd               | nd  | nd                   | nd  | +                   | -             |
| Cefpodoxime proxetil 10µg                      | +                    | +   | nd               | nd  | nd                   | nd  | +                   | -             |
| Cefoxitin 30µg                                 | +                    | +   | -                | +   | nd                   | nd  | +                   | -             |
| Cefsulodin 30µg                                | +                    | +   | nd               | nd  | nd                   | nd  | nd                  | nd            |
| Ceftazidime 10µg                               | +                    | +   | nd               | nd  | nd                   | nd  | +                   | nd            |
| Cefepime 30µg                                  | +                    | +   | nd               | nd  | nd                   | nd  | +                   | -             |
| Ciprofloxacin 5µg                              | +                    | I   | nd               | nd  | nd                   | nd  | +                   | -             |
| Levofloxacin 5µg                               | +                    | I   | nd               | nd  | nd                   | nd  | -                   | -             |
| Ofloxacin 5µg                                  | +                    | +   | -                | -   | nd                   | nd  | nd                  | -             |
| Norfloxacin 10µg                               | +                    | I   | nd               | nd  | nd                   | nd  | nd                  | nd            |
| Nalidixic acid 30µg                            | +                    | +   | nd               | nd  | +                    | -   | +                   | -             |
| Trimethoprim + sulfamothoxazole 1.25 + 23.75µg | +                    | +   | -                | -   | nd                   | nd  | +                   | nd            |

|                                                  |    |    |    |    |    |    |    |    |
|--------------------------------------------------|----|----|----|----|----|----|----|----|
| <b>Aztreonam 30µg</b>                            | -  | +  | nd | nd | nd | nd | nd | nd |
| <b>Temocillin 30µg</b>                           | +  | +  | nd | nd | nd | nd | +  | -  |
| <b>Ticarcillin 75µg</b>                          | +  | +  | nd | nd | nd | nd | +  | nd |
| <b>Ticarcillin + Clavulanic acid 75 µg +10µg</b> | +  | +  | nd | nd | nd | nd | +  | -  |
| <b>Piperacillin 30µg + Tazobactam 6µg</b>        | I  | +  | nd | nd | nd | nd | +  | -  |
| <b>Amoxicillin + Clavulanic acid 20µg + 10µg</b> | +  | +  | -  | -  | nd | nd | +  | I  |
| <b>Piperacillin 30µg</b>                         | +  | +  | nd | nd | nd | nd | +  | I  |
| <b>Fusidic acid (10µg)</b>                       | nd | nd | -  | -  | nd | nd | nd | nd |
| <b>Clindamycin (2µg)</b>                         | nd | nd | -  | +  | nd | nd | nd | nd |
| <b>Erythromycin (15µg)</b>                       | nd | nd | -  | +  | nd | nd | nd | nd |
| <b>Kanamycin (30µg)</b>                          | nd | nd | +  | +  | nd | nd | nd | nd |
| <b>Oxacillin (5µg)</b>                           | nd | nd | -  | I  | nd | nd | nd | nd |
| <b>Penicillin (1µg)</b>                          | nd | nd | +  | +  | nd | nd | nd | nd |
| <b>Pristinamycin (15µg)</b>                      | nd | nd | -  | +  | nd | nd | nd | nd |
| <b>Rifampicin (5µg)</b>                          | nd | nd | -  | -  | nd | nd | nd | nd |
| <b>Tetracyclin (30µg)</b>                        | nd | nd | +  | -  | nd | nd | +  | nd |
| <b>Teicoplanin (30µg)</b>                        | nd | nd | -  | -  | nd | nd | nd | nd |
| <b>Vancomycin (5µg)</b>                          | nd | nd | I  | -  | nd | nd | nd | nd |
| <b>Cefotaxime 30µg</b>                           | nd | nd | nd | nd | nd | nd | nd | nd |
| <b>Colistin 50µg</b>                             | nd | nd | nd | nd | nd | nd | nd | nd |

Table 3S. The inhibition percentage of defatted peel (DP) and non-defatted peel (NDP) of *P. trimera* at a concentration of 512 µg/mL against clinically isolated bacterial strains using broth dilution assay

| Sample     | <i>P. aeruginosa</i> |              | <i>S. aureus</i> |              | <i>Salmonella sp</i> |              | <i>A. baumannii</i> | <i>E.coli</i> |
|------------|----------------------|--------------|------------------|--------------|----------------------|--------------|---------------------|---------------|
|            | PA1                  | PA2          | SA1              | SA2          | SS1                  | SS2          | AB                  | EC            |
| <b>DP</b>  | 99.98 ± 0.18         | 98.81 ± 1.07 | 42.70 ± 3.64     | 99.73 ± 0.57 | 100 ± 0              | 99.23 ± 1.33 | 45.79 ± 0.34        | 10.74 ± 3.19  |
| <b>NDP</b> | 95.55 ± 2.08         | 98.70 ± 2.24 | 95.63 ± 1.14     | 99.67 ± 0.68 | 100 ± 0              | 100 ± 0      | 19.06 ± 2.13        | 1.05 ± 2.69   |
| <b>Ab</b>  | 99.88 ± 0.19         | 94.44 ± 2.98 | 99.43 ± 0.27     | 98.29 ± 0.13 | 98.33 ± 0.76         | 96.86 ± 2.89 | 67.11 ± 4.37        | 91.87 ± 3.12  |
